# Supplementary material for: FYVE domain-containing protein ZFYVE28 regulates EGFR-signaling in podocytes but is not critical for the function of filtration barrier in mice
Source: PubMed Central journal article supplement (PMC5856817; doi:10.1038/s41598-018-23104-z), 2018-03-16
Supplement: 41598_2018_23104_MOESM1_ESM.pdf [file 41598_2018_23104_MOESM1_ESM.pdf]

# Supplementary material for

## **FYVE domain-containing protein ZFYVE28 regulates EGFR-signaling in podocytes but is not critical for the function of filtration barrier in mice**

Sonia Zambrano Sevilla<sup>1</sup>, Patricia Q Rodriguez<sup>1</sup>, Jing Guo<sup>1</sup>, Katja Möller-Hackbarth<sup>1</sup>, Angelina Schwarz<sup>1</sup>, Jaakko Patrakka<sup>1</sup>

<sup>1</sup>KI/AZ Integrated CardioMetabolic Center, Department of Laboratory Medicine, Karolinska Institutet at Karolinska University Hospital Huddinge, Stockholm, Sweden

# Supplement figure 1

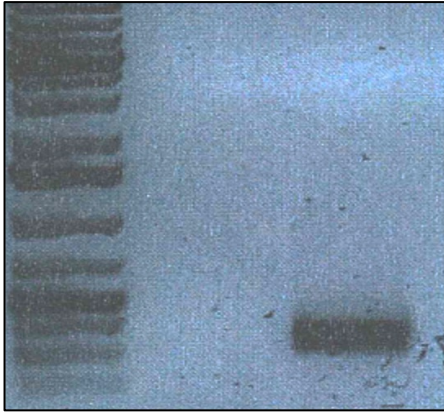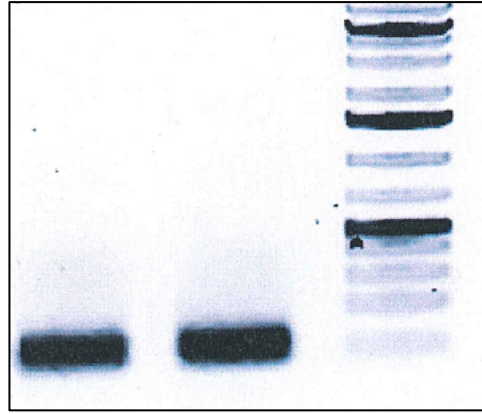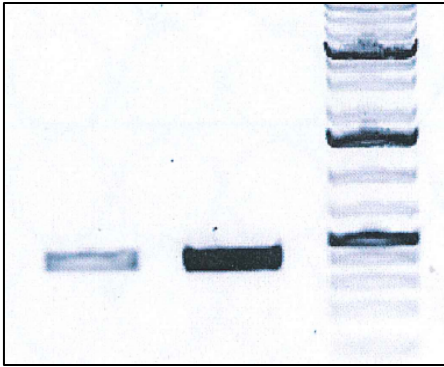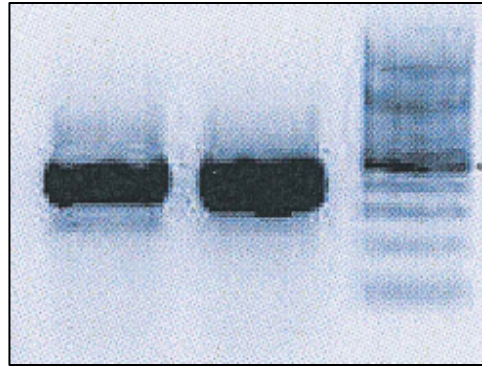

**Supplementary figure 1.** Full image of the gels from figure 4. The marks correspond to the GeneRuler 100bp DNA Ladder, Thermo Fisher.

## Supplement figure 2

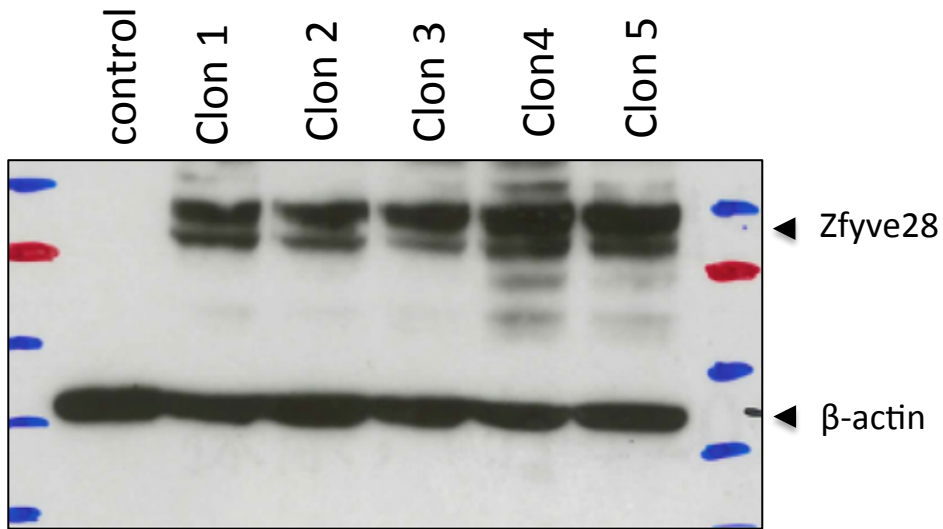

**Supplementary figure 2.** Western blotting analysis of ZFYVE28 in control and over-expressing human podocytes clones. The marks correspond to the PageRuler prestained protein ladder 10-170 KDa (Fermentas)

# Supplement figure 3

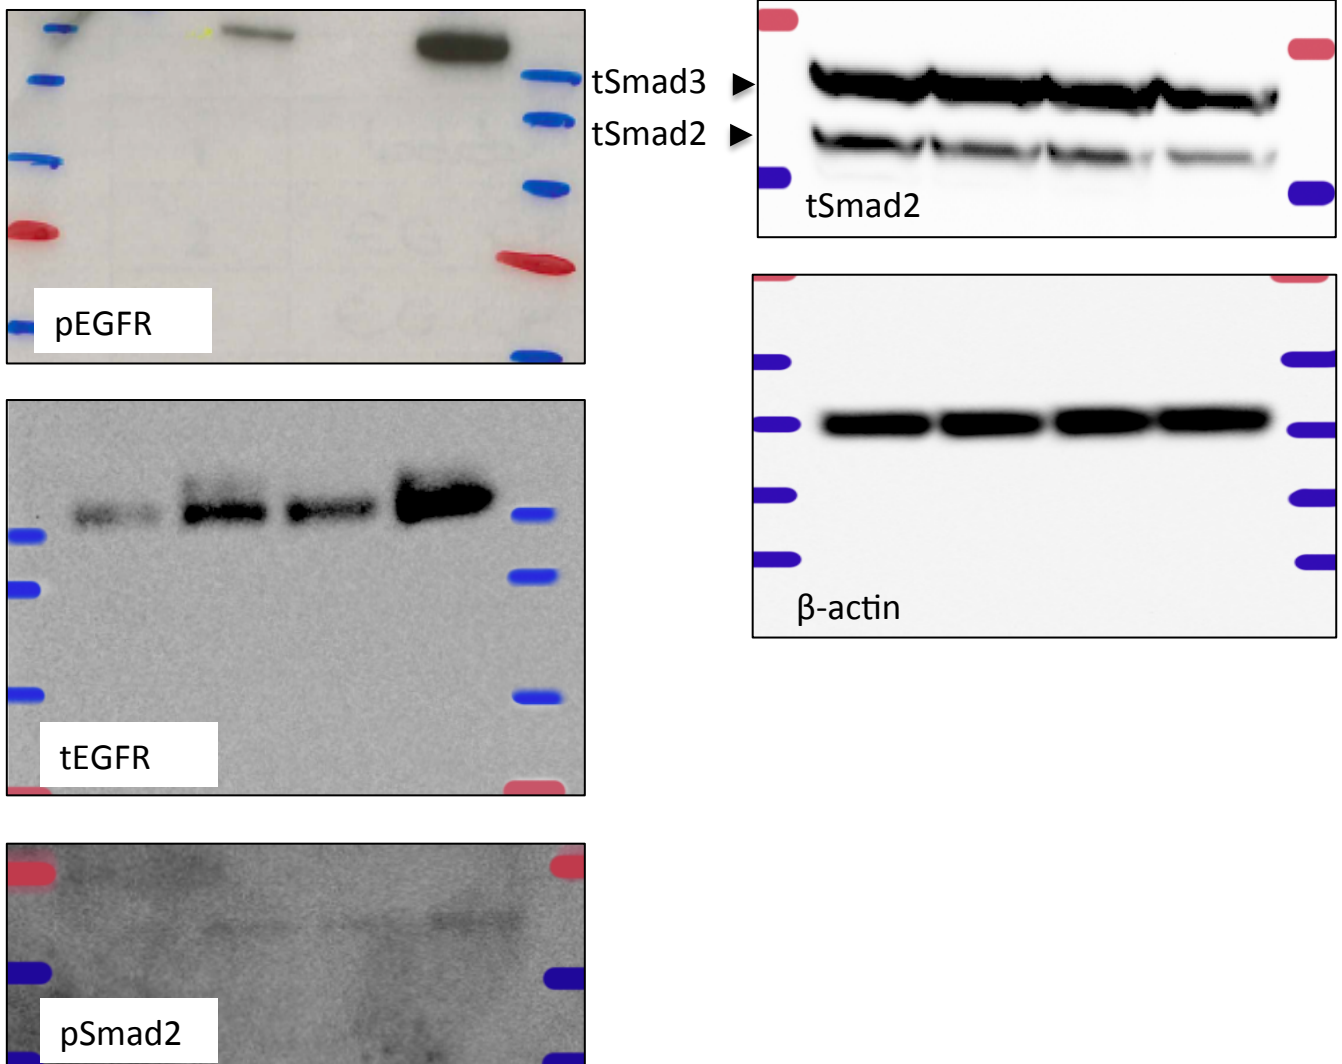

**Supplementary figure 3.** full image of the blots from figure 3. The marks correspond to the PageRuler prestained protein ladder 10-170 KDa (Fermentas)

Supplement figure 4

**A**

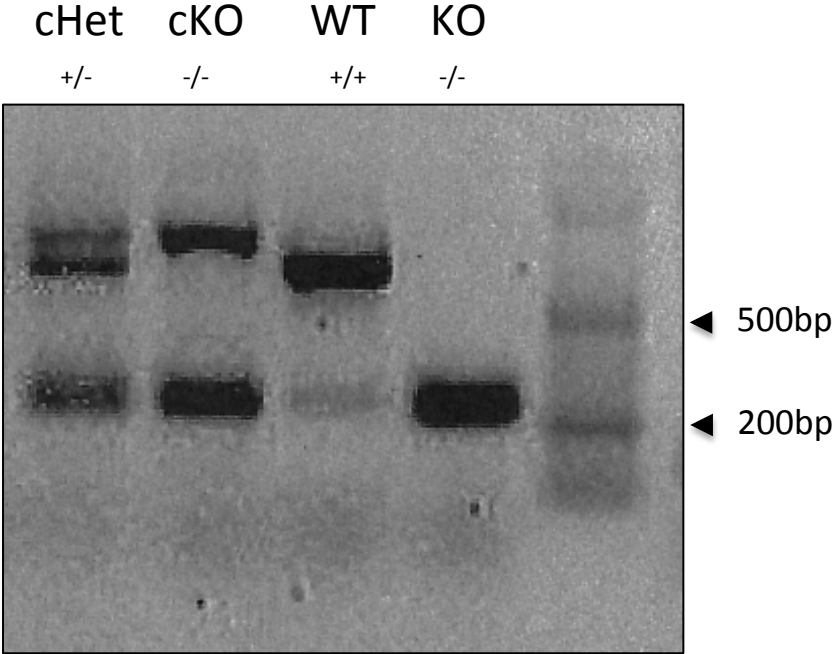

**B**

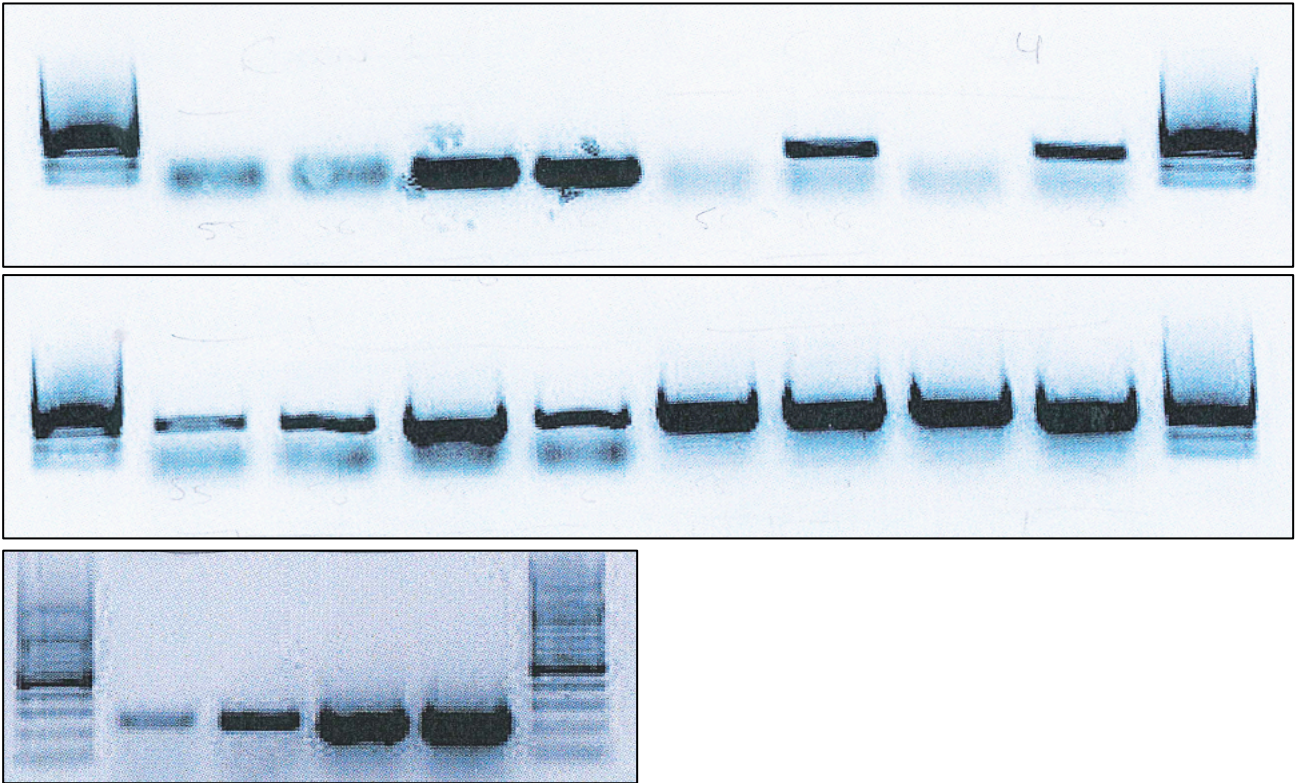

**Supplementary figure 4.** (A-B) Full image of the gels from figure 4. The marks correspond to the GeneRuler 50bp DNA Ladder, Thermo Fisher.

## Supplement figure 5

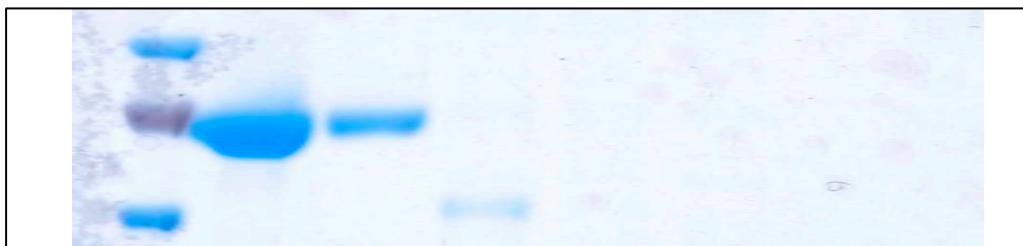

**Supplementary figure 5.** full image of the gel from figure 5. The marks correspond to the PageRuler prestained protein ladder 10-170 KDa (Fermentas)

## Supplement figure 6

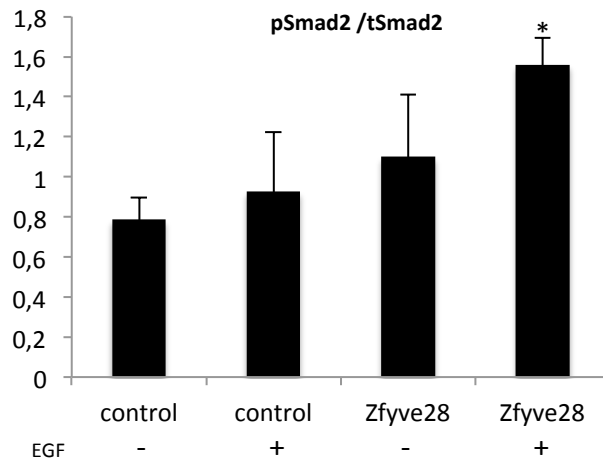

**Supplementary figure 6.** Ratio pSmad2/tSmad2. The standard error has been calculated from 3 independent experiment.
